# Supplementary material for: A PEG-b-poly(disulfide-l-lysine) based redox-responsive cationic polymer for efficient gene transfection
Source: Royal Society of Chemistry journal article supplement (doi:10.1039/c8tb03226b), 2019-01-01
Supplement: c8tb03226b1.pdf [file c8tb03226b1.pdf]

## Electronic supplementary information

### PEG-b-polydisulfide-L-lysine based redox responsive cationic polymer for efficient gene transfection

Ihsan Ullah<sup>a#</sup>, Jing Zhao<sup>a,b#</sup>, Shah Rukh<sup>c</sup>, Khan Muhammad<sup>a</sup>, Jintang Guo<sup>a,b</sup>, Xiangkui Ren<sup>\*a,b,d</sup>, Shihai Xia<sup>\*e</sup>, Wencheng Zhang<sup>f</sup>, Yakai Feng<sup>\*a,b,d</sup>

---

*a. School of Chemical Engineering and Technology, Tianjin University, Yaguan Road 135, Tianjin 300350, China*

*b. Collaborative Innovation Centre of Chemical Science and Chemical Engineering (Tianjin), Weijin Road 92, Tianjin 300072, China*

*c. Department of Chemistry, School of Science Abdul Wali Khan University, Mardan 23200 Pakistan.*

*d. Key Laboratory of Systems Bioengineering of Ministry of Education, Tianjin University, Weijin Road 92, Tianjin 300072, China.*

*e. Department of Hepatopancreatobiliary and Splenic Medicine, Affiliated Hospital, Logistics University of People's Armed Police Force, 220 Chenglin Road, Tianjin 300162, China.*

*f. Department of Physiology and Pathophysiology, Logistics University of Chinese People's Armed Police Force, Tianjin 300309, China*

*g.*

#Ihsan Ullah and Jing Zhao contributed equally to this work.

\*Corresponding Author: Y. Feng, School of Chemical Engineering and Technology, Tianjin University, Tianjin 300350, China. E-mail: yakai.feng@tju.edu.cn

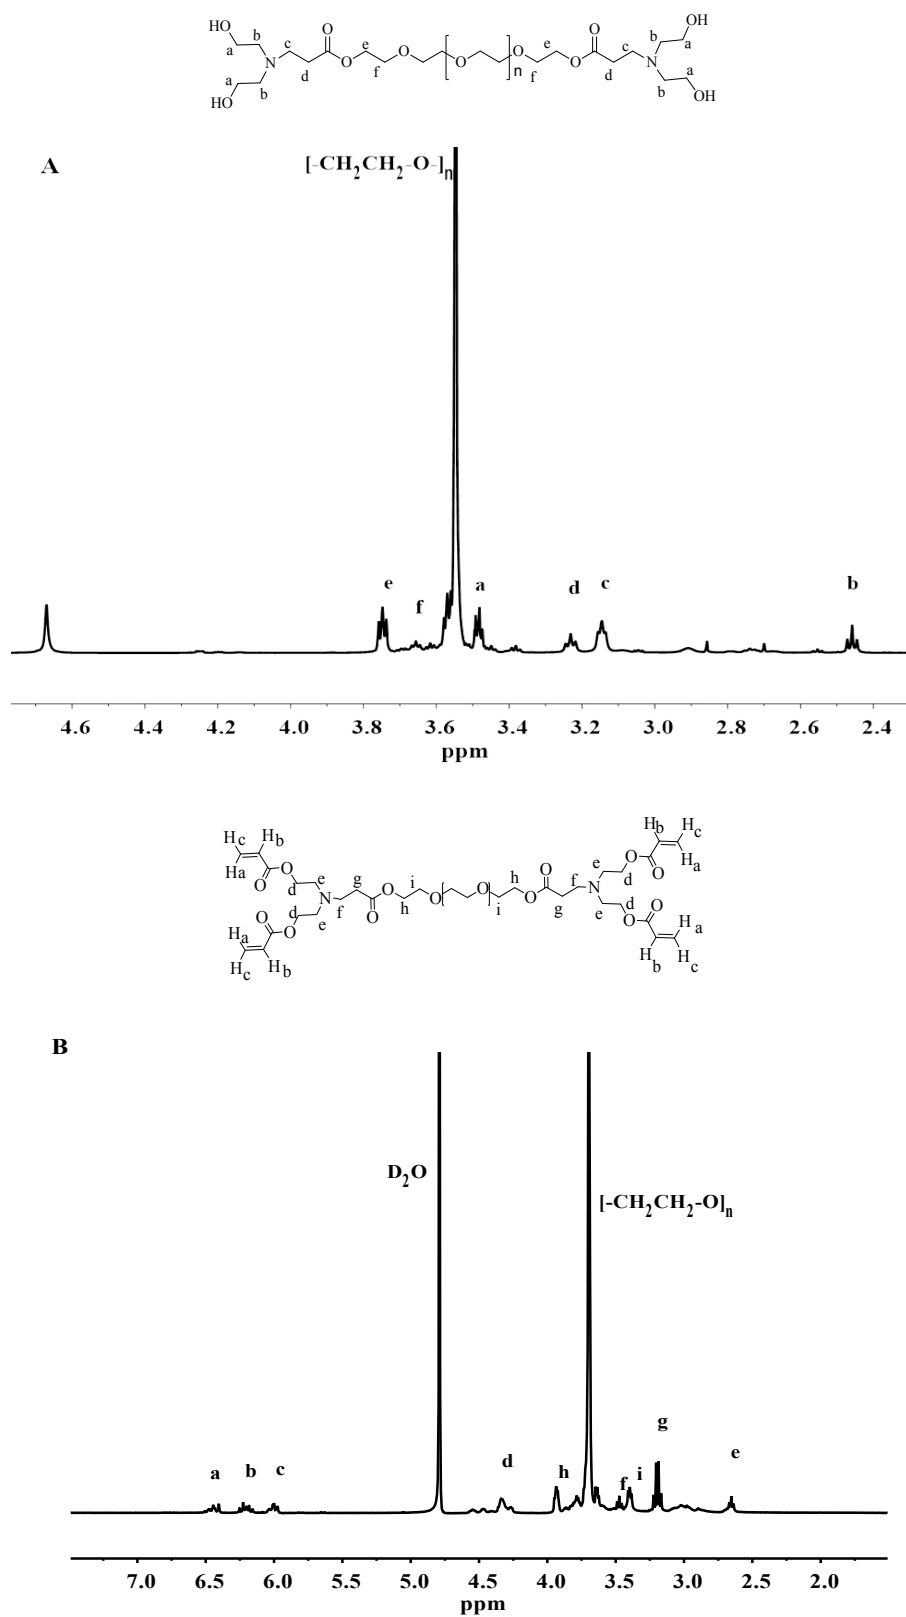

Figure S1  $^1\text{H}$ NMR spectra of PEG(OH) $_4$  (A) and PEG(Ac) $_4$  (B).
